# Supplementary material
Source: publisher figshare collection journal article supplement (https://tandf.figshare.com/ndownloader/files/12259844)
Supplement: Supplementary file 1 [file 12259844]

**Supplementary Material**

**Bis Phenylene Flattened 13-Membered Tetraamide Macrocyclic Ligand (TAML) For Square Planar Cobalt(III)**

W. Chadwick Ellis,a Alexander D. Ryabov,*a Andreas Fischer,b Joshua A. Hayden,a [[1]](#footnote-1)Longzhu Q. Shen,a[[2]](#footnote-2) Emile L. Bominaar, Michael P. Hendrich,a Terrence J. Collins*a

a*Department of Chemistry, Carnegie Mellon University, 4400 Fifth Avenue, Pittsburgh, PA 15213, USA*; b*Inorganic Chemistry, Department of Chemistry, Royal Institute of Technology, S-100 44 Stockholm, Sweden*

**Cif and checkcif files for 7b**

**1. Cif file**

data_shelxl

_audit_creation_method SHELXL-97

_chemical_name_systematic

;

?

;

_chemical_name_common ?

_chemical_melting_point ?

_chemical_formula_moiety ?

_chemical_formula_sum

'C43 H43 Co N4 O4 P'

_chemical_formula_weight 769.71

loop_

_atom_type_symbol

_atom_type_description

_atom_type_scat_dispersion_real

_atom_type_scat_dispersion_imag

_atom_type_scat_source

'C' 'C' 0.0033 0.0016

'International Tables Vol C Tables 4.2.6.8 and 6.1.1.4'

'H' 'H' 0.0000 0.0000

'International Tables Vol C Tables 4.2.6.8 and 6.1.1.4'

'Co' 'Co' 0.3494 0.9721

'International Tables Vol C Tables 4.2.6.8 and 6.1.1.4'

'N' 'N' 0.0061 0.0033

'International Tables Vol C Tables 4.2.6.8 and 6.1.1.4'

'O' 'O' 0.0106 0.0060

'International Tables Vol C Tables 4.2.6.8 and 6.1.1.4'

'P' 'P' 0.1023 0.0942

'International Tables Vol C Tables 4.2.6.8 and 6.1.1.4'

_symmetry_cell_setting monoclinic

_symmetry_space_group_name_H-M P2(1)/c

loop_

_symmetry_equiv_pos_as_xyz

'x, y, z'

'-x, y+1/2, -z+1/2'

'-x, -y, -z'

'x, -y-1/2, z-1/2'

_cell_length_a 11.1840(15)

_cell_length_b 10.9650(3)

_cell_length_c 28.742(3)

_cell_angle_alpha 90.00

_cell_angle_beta 96.469(10)

_cell_angle_gamma 90.00

_cell_volume 3502.3(6)

_cell_formula_units_Z 4

_cell_measurement_temperature 293(2)

_cell_measurement_reflns_used ?

_cell_measurement_theta_min ?

_cell_measurement_theta_max ?

_exptl_crystal_description plate

_exptl_crystal_colour purple

_exptl_crystal_size_max .4

_exptl_crystal_size_mid .4

_exptl_crystal_size_min .1

_exptl_crystal_density_meas ?

_exptl_crystal_density_diffrn 1.460

_exptl_crystal_density_method 'not measured'

_exptl_crystal_F_000 1612

_exptl_absorpt_coefficient_mu 0.588

_exptl_absorpt_correction_type ?

_exptl_absorpt_correction_T_min ?

_exptl_absorpt_correction_T_max ?

_exptl_absorpt_process_details ?

_exptl_special_details

;

?

;

_diffrn_ambient_temperature 293(2)

_diffrn_radiation_wavelength 0.71073

_diffrn_radiation_type MoK\a

_diffrn_radiation_source 'fine-focus sealed tube'

_diffrn_radiation_monochromator graphite

_diffrn_measurement_device 'Bruyker-Nonius KappaCCD'

_diffrn_measurement_method ?

_diffrn_detector_area_resol_mean ?

_diffrn_standards_number ?

_diffrn_standards_interval_count ?

_diffrn_standards_interval_time ?

_diffrn_standards_decay_% ?

_diffrn_reflns_number 32212

_diffrn_reflns_av_R_equivalents 0.0643

_diffrn_reflns_av_sigmaI/netI 0.0716

_diffrn_reflns_limit_h_min -13

_diffrn_reflns_limit_h_max 13

_diffrn_reflns_limit_k_min -11

_diffrn_reflns_limit_k_max 13

_diffrn_reflns_limit_l_min -35

_diffrn_reflns_limit_l_max 32

_diffrn_reflns_theta_min 4.57

_diffrn_reflns_theta_max 26.00

_reflns_number_total 6842

_reflns_number_gt 4409

_reflns_threshold_expression >2sigma(I)

_computing_data_collection 'Collect'

_computing_cell_refinement ?

_computing_data_reduction 'EvalCCD'

_computing_structure_solution 'SHELXS-97 (Sheldrick, 1990)'

_computing_structure_refinement 'SHELXL-97 (Sheldrick, 1997)'

_computing_molecular_graphics ?

_computing_publication_material ?

_refine_special_details

;

Refinement of F^2^ against ALL reflections. The weighted R-factor wR and

goodness of fit S are based on F^2^, conventional R-factors R are based

on F, with F set to zero for negative F^2^. The threshold expression of

F^2^ > 2sigma(F^2^) is used only for calculating R-factors(gt) etc. and is

not relevant to the choice of reflections for refinement. R-factors based

on F^2^ are statistically about twice as large as those based on F, and R-

factors based on ALL data will be even larger.

;

_refine_ls_structure_factor_coef Fsqd

_refine_ls_matrix_type full

_refine_ls_weighting_scheme calc

_refine_ls_weighting_details

'calc w=1/[\s^2^(Fo^2^)+(0.0433P)^2^+2.4503P] where P=(Fo^2^+2Fc^2^)/3'

_atom_sites_solution_primary direct

_atom_sites_solution_secondary difmap

_atom_sites_solution_hydrogens geom

_refine_ls_hydrogen_treatment noref

_refine_ls_extinction_method none

_refine_ls_extinction_coef ?

_refine_ls_number_reflns 6842

_refine_ls_number_parameters 478

_refine_ls_number_restraints 0

_refine_ls_R_factor_all 0.1014

_refine_ls_R_factor_gt 0.0484

_refine_ls_wR_factor_ref 0.1097

_refine_ls_wR_factor_gt 0.0913

_refine_ls_goodness_of_fit_ref 0.994

_refine_ls_restrained_S_all 0.994

_refine_ls_shift/su_max 0.001

_refine_ls_shift/su_mean 0.000

loop_

_atom_site_label

_atom_site_type_symbol

_atom_site_fract_x

_atom_site_fract_y

_atom_site_fract_z

_atom_site_U_iso_or_equiv

_atom_site_adp_type

_atom_site_occupancy

_atom_site_symmetry_multiplicity

_atom_site_calc_flag

_atom_site_refinement_flags

_atom_site_disorder_assembly

_atom_site_disorder_group

Co1 Co 0.90684(3) 0.15693(3) 0.686812(13) 0.03111(13) Uani 1 1 d . . .

P1 P 0.76466(7) 0.50004(7) 0.56098(3) 0.0350(2) Uani 1 1 d . . .

N1 N 0.8633(2) 0.0646(2) 0.63489(8) 0.0329(6) Uani 1 1 d . . .

O2 O 1.16975(18) 0.0541(2) 0.61768(7) 0.0466(6) Uani 1 1 d . . .

N3 N 0.74799(19) 0.1497(2) 0.69705(8) 0.0312(5) Uani 1 1 d . . .

N4 N 0.9711(2) 0.2431(2) 0.73879(8) 0.0318(6) Uani 1 1 d . . .

O4 O 0.62896(19) 0.1275(2) 0.75610(8) 0.0509(6) Uani 1 1 d . . .

C8 C 1.0759(3) 0.0769(3) 0.63333(10) 0.0346(7) Uani 1 1 d . . .

N2 N 1.0598(2) 0.1447(2) 0.67177(8) 0.0332(6) Uani 1 1 d . . .

O1 O 0.9470(2) -0.0323(2) 0.57489(8) 0.0609(7) Uani 1 1 d . . .

C1 C 0.6766(2) 0.0784(2) 0.66319(10) 0.0307(7) Uani 1 1 d . . .

C32 C 0.6411(3) 0.4904(3) 0.59537(10) 0.0358(7) Uani 1 1 d . . .

C14 C 1.0990(2) 0.2516(3) 0.74207(11) 0.0348(7) Uani 1 1 d . . .

C6 C 0.7411(2) 0.0331(2) 0.62773(10) 0.0314(7) Uani 1 1 d . . .

C9 C 1.1476(2) 0.1966(3) 0.70425(10) 0.0324(7) Uani 1 1 d . . .

C19 C 0.7102(2) 0.1792(3) 0.73953(10) 0.0338(7) Uani 1 1 d . . .

C2 C 0.5538(3) 0.0562(3) 0.66101(11) 0.0384(7) Uani 1 1 d . . .

H2 H 0.5101 0.0855 0.6843 0.046 Uiso 1 1 calc R . .

C7 C 0.9546(3) 0.0287(3) 0.61040(11) 0.0386(7) Uani 1 1 d . . .

C26 C 0.9028(3) 0.4908(3) 0.59864(11) 0.0380(7) Uani 1 1 d . . .

C20 C 0.7518(3) 0.6404(3) 0.52910(10) 0.0375(7) Uani 1 1 d . . .

O3 O 0.9536(2) 0.3532(4) 0.80397(13) 0.1392(18) Uani 1 1 d . . .

C15 C 0.9072(3) 0.2971(3) 0.77071(12) 0.0504(9) Uani 1 1 d . . .

C27 C 0.9081(3) 0.5288(3) 0.64464(12) 0.0490(9) Uani 1 1 d . . .

H27 H 0.8402 0.5621 0.6557 0.059 Uiso 1 1 calc R . .

C5 C 0.6834(3) -0.0348(3) 0.59124(11) 0.0440(8) Uani 1 1 d . . .

H5 H 0.7262 -0.0664 0.5680 0.053 Uiso 1 1 calc R . .

C4 C 0.5612(3) -0.0548(3) 0.58992(12) 0.0520(9) Uani 1 1 d . . .

H4 H 0.5215 -0.0998 0.5654 0.062 Uiso 1 1 calc R . .

C25 C 0.6392(3) 0.6800(3) 0.51009(11) 0.0485(9) Uani 1 1 d . . .

H25 H 0.5706 0.6387 0.5169 0.058 Uiso 1 1 calc R . .

C38 C 0.7626(3) 0.3781(3) 0.51930(11) 0.0379(7) Uani 1 1 d . . .

C33 C 0.6087(3) 0.5928(3) 0.61954(12) 0.0476(8) Uani 1 1 d . . .

H33 H 0.6472 0.6668 0.6160 0.057 Uiso 1 1 calc R . .

C3 C 0.4973(3) -0.0094(3) 0.62407(12) 0.0457(8) Uani 1 1 d . . .

H3 H 0.4148 -0.0231 0.6222 0.055 Uiso 1 1 calc R . .

C16 C 0.7698(3) 0.2919(3) 0.76417(10) 0.0360(7) Uani 1 1 d . . .

C21 C 0.8530(3) 0.7039(3) 0.51947(11) 0.0467(8) Uani 1 1 d . . .

H21 H 0.9288 0.6794 0.5328 0.056 Uiso 1 1 calc R . .

C43 C 0.7291(3) 0.3987(3) 0.47251(12) 0.0572(10) Uani 1 1 d . . .

H43 H 0.7012 0.4753 0.4625 0.069 Uiso 1 1 calc R . .

C12 C 1.2988(3) 0.3047(3) 0.77378(14) 0.0553(10) Uani 1 1 d . . .

H12 H 1.3506 0.3410 0.7974 0.066 Uiso 1 1 calc R . .

C39 C 0.8000(3) 0.2618(3) 0.53329(12) 0.0543(9) Uani 1 1 d . . .

H39 H 0.8201 0.2450 0.5649 0.065 Uiso 1 1 calc R . .

C29 C 1.1132(3) 0.4697(3) 0.65842(14) 0.0544(9) Uani 1 1 d . . .

H29 H 1.1839 0.4625 0.6786 0.065 Uiso 1 1 calc R . .

C10 C 1.2703(3) 0.1968(3) 0.70139(12) 0.0426(8) Uani 1 1 d . . .

H10 H 1.3014 0.1606 0.6761 0.051 Uiso 1 1 calc R . .

C37 C 0.5819(3) 0.3816(3) 0.60052(12) 0.0484(9) Uani 1 1 d . . .

H37 H 0.6028 0.3124 0.5846 0.058 Uiso 1 1 calc R . .

C18 C 0.7267(4) 0.4022(3) 0.73445(14) 0.0682(11) Uani 1 1 d . . .

H18A H 0.6403 0.4024 0.7295 0.102 Uiso 1 1 calc R . .

H18B H 0.7583 0.3980 0.7048 0.102 Uiso 1 1 calc R . .

H18C H 0.7543 0.4756 0.7504 0.102 Uiso 1 1 calc R . .

C41 C 0.7777(4) 0.1939(3) 0.45418(14) 0.0640(11) Uani 1 1 d . . .

H41 H 0.7852 0.1330 0.4322 0.077 Uiso 1 1 calc R . .

C31 C 1.0057(3) 0.4424(3) 0.58306(13) 0.0568(9) Uani 1 1 d . . .

H31 H 1.0044 0.4169 0.5522 0.068 Uiso 1 1 calc R . .

C22 C 0.8411(4) 0.8038(3) 0.49006(13) 0.0576(10) Uani 1 1 d . . .

H22 H 0.9089 0.8464 0.4833 0.069 Uiso 1 1 calc R . .

C13 C 1.1768(3) 0.3056(3) 0.77704(12) 0.0472(8) Uani 1 1 d . . .

H13 H 1.1468 0.3422 0.8025 0.057 Uiso 1 1 calc R . .

C24 C 0.6284(4) 0.7805(3) 0.48112(12) 0.0574(10) Uani 1 1 d . . .

H24 H 0.5527 0.8074 0.4686 0.069 Uiso 1 1 calc R . .

C35 C 0.4619(3) 0.4764(4) 0.65335(13) 0.0575(10) Uani 1 1 d . . .

H35 H 0.4015 0.4716 0.6731 0.069 Uiso 1 1 calc R . .

C30 C 1.1098(3) 0.4322(4) 0.61328(15) 0.0627(10) Uani 1 1 d . . .

H30 H 1.1784 0.3992 0.6027 0.075 Uiso 1 1 calc R . .

C11 C 1.3458(3) 0.2513(3) 0.73648(13) 0.0512(9) Uani 1 1 d . . .

H11 H 1.4285 0.2521 0.7350 0.061 Uiso 1 1 calc R . .

C23 C 0.7291(4) 0.8401(3) 0.47090(12) 0.0590(10) Uani 1 1 d . . .

H23 H 0.7216 0.9064 0.4506 0.071 Uiso 1 1 calc R . .

C40 C 0.8076(3) 0.1711(3) 0.50056(14) 0.0625(10) Uani 1 1 d . . .

H40 H 0.8334 0.0937 0.5103 0.075 Uiso 1 1 calc R . .

C17 C 0.7264(4) 0.3036(4) 0.81229(13) 0.0729(12) Uani 1 1 d . . .

H17A H 0.6401 0.3004 0.8092 0.109 Uiso 1 1 calc R . .

H17B H 0.7532 0.3799 0.8261 0.109 Uiso 1 1 calc R . .

H17C H 0.7586 0.2378 0.8319 0.109 Uiso 1 1 calc R . .

C34 C 0.5201(3) 0.5845(4) 0.64861(13) 0.0560(10) Uani 1 1 d . . .

H34 H 0.4994 0.6528 0.6652 0.067 Uiso 1 1 calc R . .

C36 C 0.4916(3) 0.3759(4) 0.62942(13) 0.0598(10) Uani 1 1 d . . .

H36 H 0.4509 0.3029 0.6326 0.072 Uiso 1 1 calc R . .

C42 C 0.7365(4) 0.3068(4) 0.44019(13) 0.0730(12) Uani 1 1 d . . .

H42 H 0.7133 0.3219 0.4086 0.088 Uiso 1 1 calc R . .

C28 C 1.0132(3) 0.5178(3) 0.67416(13) 0.0589(10) Uani 1 1 d . . .

H28 H 1.0159 0.5434 0.7051 0.071 Uiso 1 1 calc R . .

loop_

_atom_site_aniso_label

_atom_site_aniso_U_11

_atom_site_aniso_U_22

_atom_site_aniso_U_33

_atom_site_aniso_U_23

_atom_site_aniso_U_13

_atom_site_aniso_U_12

Co1 0.0263(2) 0.0384(2) 0.0295(2) -0.00530(18) 0.00691(16) -0.00185(18)

P1 0.0398(5) 0.0348(4) 0.0312(5) -0.0003(4) 0.0075(3) 0.0000(4)

N1 0.0297(14) 0.0393(14) 0.0302(14) -0.0055(11) 0.0059(11) 0.0014(11)

O2 0.0371(13) 0.0612(14) 0.0450(14) -0.0043(11) 0.0194(10) 0.0060(11)

N3 0.0270(12) 0.0355(14) 0.0321(14) -0.0060(11) 0.0072(10) -0.0006(11)

N4 0.0285(13) 0.0350(14) 0.0327(14) -0.0057(11) 0.0074(10) -0.0014(10)

O4 0.0452(13) 0.0659(15) 0.0455(14) -0.0091(12) 0.0214(11) -0.0166(11)

C8 0.0332(17) 0.0379(18) 0.0343(18) 0.0039(14) 0.0109(14) 0.0016(14)

N2 0.0294(13) 0.0393(14) 0.0317(14) -0.0021(12) 0.0071(11) -0.0001(11)

O1 0.0526(15) 0.0876(18) 0.0437(15) -0.0307(14) 0.0102(11) 0.0043(13)

C1 0.0300(16) 0.0286(16) 0.0329(18) 0.0010(13) 0.0016(13) 0.0003(13)

C32 0.0348(17) 0.0424(19) 0.0301(17) 0.0015(14) 0.0030(13) 0.0019(14)

C14 0.0297(16) 0.0329(16) 0.0412(19) 0.0002(14) 0.0017(14) -0.0008(13)

C6 0.0310(16) 0.0309(16) 0.0319(17) -0.0018(13) 0.0024(13) -0.0004(13)

C9 0.0263(16) 0.0321(16) 0.0389(18) 0.0029(14) 0.0038(13) -0.0013(12)

C19 0.0254(16) 0.0441(19) 0.0327(17) -0.0011(14) 0.0069(13) 0.0040(13)

C2 0.0285(17) 0.0429(18) 0.044(2) -0.0037(15) 0.0033(14) 0.0001(14)

C7 0.0413(19) 0.0454(19) 0.0301(18) -0.0006(15) 0.0084(14) 0.0058(15)

C26 0.0401(18) 0.0365(18) 0.0383(19) 0.0000(14) 0.0084(14) -0.0019(14)

C20 0.0460(19) 0.0333(17) 0.0339(18) -0.0030(14) 0.0077(14) -0.0040(14)

O3 0.0428(17) 0.230(4) 0.145(3) -0.152(3) 0.0121(18) -0.013(2)

C15 0.0375(19) 0.059(2) 0.055(2) -0.0281(19) 0.0063(17) -0.0039(16)

C27 0.046(2) 0.058(2) 0.042(2) -0.0123(17) 0.0030(16) 0.0032(16)

C5 0.044(2) 0.051(2) 0.0365(19) -0.0132(16) 0.0057(15) -0.0024(16)

C4 0.047(2) 0.056(2) 0.051(2) -0.0158(18) -0.0080(17) -0.0084(17)

C25 0.057(2) 0.044(2) 0.044(2) 0.0037(16) 0.0013(17) -0.0063(16)

C38 0.0460(19) 0.0367(18) 0.0320(18) -0.0024(14) 0.0089(14) -0.0020(14)

C33 0.048(2) 0.046(2) 0.050(2) -0.0019(17) 0.0109(17) 0.0005(16)

C3 0.0318(18) 0.050(2) 0.053(2) -0.0024(17) -0.0026(16) -0.0038(15)

C16 0.0336(17) 0.0401(18) 0.0363(18) -0.0121(14) 0.0124(13) -0.0006(13)

C21 0.053(2) 0.044(2) 0.045(2) -0.0063(17) 0.0169(16) -0.0017(16)

C43 0.088(3) 0.042(2) 0.041(2) -0.0005(17) 0.0021(19) 0.0069(19)

C12 0.0332(19) 0.050(2) 0.078(3) -0.0150(19) -0.0128(18) -0.0048(16)

C39 0.080(3) 0.039(2) 0.042(2) -0.0004(17) 0.0006(18) 0.0046(18)

C29 0.043(2) 0.055(2) 0.063(3) 0.0072(19) -0.0039(18) -0.0066(17)

C10 0.0333(18) 0.0415(18) 0.054(2) -0.0002(16) 0.0102(15) 0.0000(14)

C37 0.051(2) 0.050(2) 0.046(2) -0.0026(17) 0.0122(17) -0.0035(16)

C18 0.076(3) 0.043(2) 0.081(3) -0.010(2) -0.011(2) 0.0055(19)

C41 0.088(3) 0.049(2) 0.056(3) -0.020(2) 0.008(2) -0.001(2)

C31 0.052(2) 0.075(3) 0.045(2) -0.0034(19) 0.0120(18) 0.0062(19)

C22 0.080(3) 0.043(2) 0.056(2) -0.0024(18) 0.032(2) -0.0129(19)

C13 0.0370(19) 0.050(2) 0.053(2) -0.0123(17) -0.0005(16) -0.0006(15)

C24 0.077(3) 0.044(2) 0.048(2) 0.0015(18) -0.0090(19) 0.0041(19)

C35 0.038(2) 0.088(3) 0.049(2) 0.007(2) 0.0141(16) 0.004(2)

C30 0.042(2) 0.078(3) 0.069(3) 0.006(2) 0.014(2) 0.0103(19)

C11 0.0271(17) 0.049(2) 0.077(3) -0.0045(19) 0.0040(17) -0.0033(15)

C23 0.099(3) 0.039(2) 0.040(2) 0.0033(17) 0.014(2) 0.001(2)

C40 0.084(3) 0.035(2) 0.066(3) -0.0038(19) -0.003(2) 0.0084(18)

C17 0.073(3) 0.097(3) 0.055(2) -0.037(2) 0.034(2) -0.029(2)

C34 0.047(2) 0.070(3) 0.052(2) -0.0090(19) 0.0115(18) 0.0124(19)

C36 0.053(2) 0.069(3) 0.060(3) 0.007(2) 0.0150(19) -0.0154(19)

C42 0.124(4) 0.058(3) 0.035(2) -0.0098(19) 0.001(2) 0.007(2)

C28 0.062(3) 0.063(2) 0.049(2) -0.0135(19) -0.0035(19) -0.0064(19)

_geom_special_details

;

All esds (except the esd in the dihedral angle between two l.s. planes)

are estimated using the full covariance matrix. The cell esds are taken

into account individually in the estimation of esds in distances, angles

and torsion angles; correlations between esds in cell parameters are only

used when they are defined by crystal symmetry. An approximate (isotropic)

treatment of cell esds is used for estimating esds involving l.s. planes.

;

loop_

_geom_bond_atom_site_label_1

_geom_bond_atom_site_label_2

_geom_bond_distance

_geom_bond_site_symmetry_2

_geom_bond_publ_flag

Co1 N2 1.816(2) . ?

Co1 N1 1.824(2) . ?

Co1 N3 1.835(2) . ?

Co1 N4 1.843(2) . ?

P1 C26 1.786(3) . ?

P1 C20 1.788(3) . ?

P1 C32 1.791(3) . ?

P1 C38 1.794(3) . ?

N1 C7 1.361(4) . ?

N1 C6 1.402(3) . ?

O2 C8 1.214(3) . ?

N3 C19 1.375(3) . ?

N3 C1 1.422(3) . ?

N4 C15 1.360(4) . ?

N4 C14 1.426(3) . ?

O4 C19 1.213(3) . ?

C8 N2 1.360(4) . ?

C8 C7 1.534(4) . ?

N2 C9 1.398(4) . ?

O1 C7 1.215(3) . ?

C1 C2 1.389(4) . ?

C1 C6 1.405(4) . ?

C32 C37 1.380(4) . ?

C32 C33 1.390(4) . ?

C14 C13 1.385(4) . ?

C14 C9 1.405(4) . ?

C6 C5 1.385(4) . ?

C9 C10 1.384(4) . ?

C19 C16 1.538(4) . ?

C2 C3 1.376(4) . ?

C2 H2 0.9300 . ?

C26 C27 1.381(4) . ?

C26 C31 1.387(4) . ?

C20 C21 1.383(4) . ?

C20 C25 1.385(4) . ?

O3 C15 1.204(4) . ?

C15 C16 1.529(4) . ?

C27 C28 1.376(5) . ?

C27 H27 0.9300 . ?

C5 C4 1.381(4) . ?

C5 H5 0.9300 . ?

C4 C3 1.371(5) . ?

C4 H4 0.9300 . ?

C25 C24 1.378(5) . ?

C25 H25 0.9300 . ?

C38 C43 1.373(4) . ?

C38 C39 1.387(4) . ?

C33 C34 1.370(4) . ?

C33 H33 0.9300 . ?

C3 H3 0.9300 . ?

C16 C17 1.522(4) . ?

C16 C18 1.527(5) . ?

C21 C22 1.381(5) . ?

C21 H21 0.9300 . ?

C43 C42 1.379(5) . ?

C43 H43 0.9300 . ?

C12 C13 1.378(4) . ?

C12 C11 1.377(5) . ?

C12 H12 0.9300 . ?

C39 C40 1.378(5) . ?

C39 H39 0.9300 . ?

C29 C30 1.357(5) . ?

C29 C28 1.359(5) . ?

C29 H29 0.9300 . ?

C10 C11 1.377(4) . ?

C10 H10 0.9300 . ?

C37 C36 1.379(5) . ?

C37 H37 0.9300 . ?

C18 H18A 0.9600 . ?

C18 H18B 0.9600 . ?

C18 H18C 0.9600 . ?

C41 C40 1.360(5) . ?

C41 C42 1.366(5) . ?

C41 H41 0.9300 . ?

C31 C30 1.376(5) . ?

C31 H31 0.9300 . ?

C22 C23 1.369(5) . ?

C22 H22 0.9300 . ?

C13 H13 0.9300 . ?

C24 C23 1.362(5) . ?

C24 H24 0.9300 . ?

C35 C36 1.361(5) . ?

C35 C34 1.366(5) . ?

C35 H35 0.9300 . ?

C30 H30 0.9300 . ?

C11 H11 0.9300 . ?

C23 H23 0.9300 . ?

C40 H40 0.9300 . ?

C17 H17A 0.9600 . ?

C17 H17B 0.9600 . ?

C17 H17C 0.9600 . ?

C34 H34 0.9300 . ?

C36 H36 0.9300 . ?

C42 H42 0.9300 . ?

C28 H28 0.9300 . ?

loop_

_geom_angle_atom_site_label_1

_geom_angle_atom_site_label_2

_geom_angle_atom_site_label_3

_geom_angle

_geom_angle_site_symmetry_1

_geom_angle_site_symmetry_3

_geom_angle_publ_flag

N2 Co1 N1 86.32(10) . . ?

N2 Co1 N3 171.89(10) . . ?

N1 Co1 N3 86.17(10) . . ?

N2 Co1 N4 86.51(10) . . ?

N1 Co1 N4 172.47(10) . . ?

N3 Co1 N4 100.86(10) . . ?

C26 P1 C20 111.93(14) . . ?

C26 P1 C32 109.30(14) . . ?

C20 P1 C32 108.13(14) . . ?

C26 P1 C38 107.91(14) . . ?

C20 P1 C38 107.76(14) . . ?

C32 P1 C38 111.85(14) . . ?

C7 N1 C6 128.9(2) . . ?

C7 N1 Co1 115.93(19) . . ?

C6 N1 Co1 115.01(18) . . ?

C19 N3 C1 122.2(2) . . ?

C19 N3 Co1 122.14(18) . . ?

C1 N3 Co1 113.18(17) . . ?

C15 N4 C14 121.7(2) . . ?

C15 N4 Co1 125.7(2) . . ?

C14 N4 Co1 112.57(18) . . ?

O2 C8 N2 127.8(3) . . ?

O2 C8 C7 122.0(3) . . ?

N2 C8 C7 110.2(2) . . ?

C8 N2 C9 128.1(2) . . ?

C8 N2 Co1 116.63(19) . . ?

C9 N2 Co1 114.88(19) . . ?

C2 C1 C6 119.5(3) . . ?

C2 C1 N3 127.1(3) . . ?

C6 C1 N3 113.3(2) . . ?

C37 C32 C33 119.3(3) . . ?

C37 C32 P1 121.3(2) . . ?

C33 C32 P1 119.3(2) . . ?

C13 C14 C9 118.6(3) . . ?

C13 C14 N4 128.2(3) . . ?

C9 C14 N4 113.2(2) . . ?

C5 C6 N1 127.4(3) . . ?

C5 C6 C1 120.4(3) . . ?

N1 C6 C1 112.3(2) . . ?

C10 C9 N2 126.0(3) . . ?

C10 C9 C14 121.2(3) . . ?

N2 C9 C14 112.8(2) . . ?

O4 C19 N3 123.9(3) . . ?

O4 C19 C16 119.9(3) . . ?

N3 C19 C16 116.0(2) . . ?

C3 C2 C1 119.5(3) . . ?

C3 C2 H2 120.3 . . ?

C1 C2 H2 120.3 . . ?

O1 C7 N1 127.5(3) . . ?

O1 C7 C8 121.7(3) . . ?

N1 C7 C8 110.9(3) . . ?

C27 C26 C31 118.5(3) . . ?

C27 C26 P1 120.3(2) . . ?

C31 C26 P1 121.2(2) . . ?

C21 C20 C25 119.4(3) . . ?

C21 C20 P1 121.0(2) . . ?

C25 C20 P1 119.3(2) . . ?

O3 C15 N4 123.1(3) . . ?

O3 C15 C16 117.0(3) . . ?

N4 C15 C16 119.9(3) . . ?

C28 C27 C26 120.4(3) . . ?

C28 C27 H27 119.8 . . ?

C26 C27 H27 119.8 . . ?

C4 C5 C6 118.8(3) . . ?

C4 C5 H5 120.6 . . ?

C6 C5 H5 120.6 . . ?

C3 C4 C5 121.1(3) . . ?

C3 C4 H4 119.4 . . ?

C5 C4 H4 119.4 . . ?

C24 C25 C20 120.2(3) . . ?

C24 C25 H25 119.9 . . ?

C20 C25 H25 119.9 . . ?

C43 C38 C39 118.4(3) . . ?

C43 C38 P1 120.8(2) . . ?

C39 C38 P1 120.7(2) . . ?

C34 C33 C32 119.9(3) . . ?

C34 C33 H33 120.0 . . ?

C32 C33 H33 120.0 . . ?

C4 C3 C2 120.7(3) . . ?

C4 C3 H3 119.6 . . ?

C2 C3 H3 119.6 . . ?

C17 C16 C18 109.2(3) . . ?

C17 C16 C15 107.7(3) . . ?

C18 C16 C15 106.8(3) . . ?

C17 C16 C19 108.7(3) . . ?

C18 C16 C19 106.6(2) . . ?

C15 C16 C19 117.6(2) . . ?

C22 C21 C20 119.8(3) . . ?

C22 C21 H21 120.1 . . ?

C20 C21 H21 120.1 . . ?

C38 C43 C42 120.6(3) . . ?

C38 C43 H43 119.7 . . ?

C42 C43 H43 119.7 . . ?

C13 C12 C11 121.6(3) . . ?

C13 C12 H12 119.2 . . ?

C11 C12 H12 119.2 . . ?

C40 C39 C38 120.3(3) . . ?

C40 C39 H39 119.8 . . ?

C38 C39 H39 119.8 . . ?

C30 C29 C28 120.0(3) . . ?

C30 C29 H29 120.0 . . ?

C28 C29 H29 120.0 . . ?

C11 C10 C9 119.2(3) . . ?

C11 C10 H10 120.4 . . ?

C9 C10 H10 120.4 . . ?

C36 C37 C32 119.7(3) . . ?

C36 C37 H37 120.1 . . ?

C32 C37 H37 120.1 . . ?

C16 C18 H18A 109.5 . . ?

C16 C18 H18B 109.5 . . ?

H18A C18 H18B 109.5 . . ?

C16 C18 H18C 109.5 . . ?

H18A C18 H18C 109.5 . . ?

H18B C18 H18C 109.5 . . ?

C40 C41 C42 119.5(3) . . ?

C40 C41 H41 120.3 . . ?

C42 C41 H41 120.3 . . ?

C30 C31 C26 120.1(3) . . ?

C30 C31 H31 120.0 . . ?

C26 C31 H31 120.0 . . ?

C23 C22 C21 119.8(3) . . ?

C23 C22 H22 120.1 . . ?

C21 C22 H22 120.1 . . ?

C12 C13 C14 119.5(3) . . ?

C12 C13 H13 120.2 . . ?

C14 C13 H13 120.2 . . ?

C23 C24 C25 119.7(4) . . ?

C23 C24 H24 120.1 . . ?

C25 C24 H24 120.1 . . ?

C36 C35 C34 120.4(3) . . ?

C36 C35 H35 119.8 . . ?

C34 C35 H35 119.8 . . ?

C29 C30 C31 120.6(3) . . ?

C29 C30 H30 119.7 . . ?

C31 C30 H30 119.7 . . ?

C10 C11 C12 119.9(3) . . ?

C10 C11 H11 120.1 . . ?

C12 C11 H11 120.1 . . ?

C24 C23 C22 121.0(3) . . ?

C24 C23 H23 119.5 . . ?

C22 C23 H23 119.5 . . ?

C41 C40 C39 120.6(3) . . ?

C41 C40 H40 119.7 . . ?

C39 C40 H40 119.7 . . ?

C16 C17 H17A 109.5 . . ?

C16 C17 H17B 109.5 . . ?

H17A C17 H17B 109.5 . . ?

C16 C17 H17C 109.5 . . ?

H17A C17 H17C 109.5 . . ?

H17B C17 H17C 109.5 . . ?

C35 C34 C33 120.3(3) . . ?

C35 C34 H34 119.9 . . ?

C33 C34 H34 119.9 . . ?

C35 C36 C37 120.3(3) . . ?

C35 C36 H36 119.8 . . ?

C37 C36 H36 119.8 . . ?

C41 C42 C43 120.5(4) . . ?

C41 C42 H42 119.7 . . ?

C43 C42 H42 119.7 . . ?

C29 C28 C27 120.4(3) . . ?

C29 C28 H28 119.8 . . ?

C27 C28 H28 119.8 . . ?

_diffrn_measured_fraction_theta_max 0.992

_diffrn_reflns_theta_full 26.00

_diffrn_measured_fraction_theta_full 0.992

_refine_diff_density_max 0.432

_refine_diff_density_min -0.350

_refine_diff_density_rms 0.061

**2. CheckCIF/PLATON report**

You have not supplied any structure factors. As a result the full set of tests cannot be run.

THIS REPORT IS FOR GUIDANCE ONLY. IF USED AS PART OF A REVIEW PROCEDURE

FOR PUBLICATION, IT SHOULD NOT REPLACE THE EXPERTISE OF AN EXPERIENCED

CRYSTALLOGRAPHIC REFEREE.

No syntax errors found. CIF dictionary Interpreting this report

**Datablock: shelxl**

Bond precision: C-C = 0.0050 A Wavelength=0.71073

Cell: a=11.1840(15) b=10.9650(3) c=28.742(3)

alpha=90 beta=96.469(10) gamma=90

Temperature: 293 K

Calculated Reported

Volume 3502.3(6) 3502.3(6)

Space group P 21/c P2(1)/c

Hall group -P 2ybc ?

Moiety formula

C19 H14 Co N4 O4, C24 H20

P

?

Sum formula C43 H34 Co N4 O4 P C43 H43 Co N4 O4 P

Mr 760.64 769.71

Dx,g cm-3 1.443 1.460

Z 4 4

Mu (mm-1) 0.588 0.588

F000 1576.0 1612.0

F000’ 1578.36

h,k,lmax 13,13,35 13,13,35

Nref 6899 6842

Tmin,Tmax 0.790,0.943

Tmin’ 0.790

Correction method= Not given

Data completeness= 0.992 Theta(max)= 26.000

R(reflections)= 0.0484( 4409) wR2(reflections)= 0.1097( 6842)

S = 0.994 Npar= 478

The following ALERTS were generated. Each ALERT has the format

**test-name_ALERT_alert-type_alert-level**.

Click on the hyperlinks for more details of the test.

**Alert level A**

PLAT183_ALERT_1_A Missing _cell_measurement_reflns_used Value .... Please Do !

PLAT184_ALERT_1_A Missing _cell_measurement_theta_min Value ...... Please Do !

PLAT185_ALERT_1_A Missing _cell_measurement_theta_max Value ...... Please Do !

**Alert level B**

PLAT043_ALERT_1_B Calculated and Reported Mol. Weight Differ by .. 9.07 Check

**Alert level C**

CHEMW03_ALERT_2_C The ratio of given/expected molecular weight as

calculated from the _atom_site* data lies outside

the range 0.99 <> 1.01

From the CIF: _cell_formula_units_Z 4

From the CIF: _chemical_formula_weight 769.71

TEST: Calculate formula weight from _atom_site_*

atom mass num sum

C 12.01 43.00 516.47

H 1.01 34.00 34.27

Co 58.93 1.00 58.93

N 14.01 4.00 56.03

O 16.00 4.00 64.00

P 30.97 1.00 30.97

Calculated formula weight 760.68

PLAT041_ALERT_1_C Calc. and Reported SumFormula Strings Differ Please Check

PLAT052_ALERT_1_C Info on Absorption Correction Method Not Given Please Do !

PLAT057_ALERT_3_C Correction for Absorption Required RT(exp) ... 1.19 Do !

PLAT068_ALERT_1_C Reported F000 Differs from Calcd (or Missing)... Please Check

PLAT213_ALERT_2_C Atom O3 has ADP max/min Ratio ..... 3.4 prolate

PLAT242_ALERT_2_C Low ’MainMol’ Ueq as Compared to Neighbors of C15 Check

PLAT242_ALERT_2_C Low ’MainMol’ Ueq as Compared to Neighbors of C16 Check

PLAT369_ALERT_2_C Long C(sp2)-C(sp2) Bond C7 - C8 . 1.53 Ang.

**Alert level G**

FORMU01_ALERT_2_G There is a discrepancy between the atom counts in the

_chemical_formula_sum and the formula from the _atom_site* data.

Atom count from _chemical_formula_sum:C43 H43 Co1 N4 O4 P1

Atom count from the _atom_site data: C43 H34 Co1 N4 O4 P1

CELLZ01_ALERT_1_G Difference between formula and atom_site contents detected.

CELLZ01_ALERT_1_G WARNING: H atoms missing from atom site list. Is this intentional?

From the CIF: _cell_formula_units_Z 4

From the CIF: _chemical_formula_sum C43 H43 Co N4 O4 P

TEST: Compare cell contents of formula and atom_site data

atom Z*formula cif sites diff

C 172.00 172.00 0.00

H 172.00 136.00 36.00

Co 4.00 4.00 0.00

N 16.00 16.00 0.00

O 16.00 16.00 0.00

P 4.00 4.00 0.00

PLAT005_ALERT_5_G No Embedded Refinement Details Found in the CIF Please Do !

PLAT199_ALERT_1_G Reported _cell_measurement_temperature ..... (K) 293 Check

PLAT200_ALERT_1_G Reported _diffrn_ambient_temperature ..... (K) 293 Check

PLAT899_ALERT_4_G SHELXL97 is Deprecated and Succeeded by SHELXL 2016 Note

3 **ALERT level A** = Most likely a serious problem - resolve or explain

1 **ALERT level B** = A potentially serious problem, consider carefully

9 **ALERT level C** = Check. Ensure it is not caused by an omission or oversight

7 **ALERT level G** = General information/check it is not something unexpected

11 ALERT type 1 CIF construction/syntax error, inconsistent or missing data

6 ALERT type 2 Indicator that the structure model may be wrong or deficient

1 ALERT type 3 Indicator that the structure quality may be low

1 ALERT type 4 Improvement, methodology, query or suggestion

1 ALERT type 5 Informative message, check

It is advisable to attempt to resolve as many as possible of the alerts in all categories. Often the

minor alerts point to easily fixed oversights, errors and omissions in your CIF or refinement

strategy, so attention to these fine details can be worthwhile. In order to resolve some of the more

serious problems it may be necessary to carry out additional measurements or structure

refinements. However, the purpose of your study may justify the reported deviations and the more

serious of these should normally be commented upon in the discussion or experimental section of a

paper or in the "special_details" fields of the CIF. checkCIF was carefully designed to identify

outliers and unusual parameters, but every test has its limitations and alerts that are not important

in a particular case may appear. Conversely, the absence of alerts does not guarantee there are no

aspects of the results needing attention. It is up to the individual to critically assess their own

results and, if necessary, seek expert advice.

**Publication of your CIF in IUCr journals**

A basic structural check has been run on your CIF. These basic checks will be run on all CIFs

submitted for publication in IUCr journals (*Acta Crystallographica*, *Journal of Applied*

*Crystallography*, *Journal of Synchrotron Radiation*); however, if you intend to submit to *Acta*

*Crystallographica Section C* or *E* or *IUCrData*, you should make sure that full publication checks

are run on the final version of your CIF prior to submission.

**Publication of your CIF in other journals**

Please refer to the *Notes for Authors* of the relevant journal for any special instructions relating to

CIF submission.

**PLATON version of 13/08/2017; check.def file version of 12/12/2017**

**Datablock shelxl** - ellipsoid plot

1. Present address: Laboratory Medicine, 525 East 68th Street, Suite F-715, New York, NY 10065 [↑](#footnote-ref-1)
2. Present address: Department of Zoology, University of Cambridge, Downing Street, Cambridge CB2 3EJ, UK [↑](#footnote-ref-2)
